# Supplementary material
Source: publisher site journal article supplement (https://www.kjim.org/upload/media/kjim-2024-209-Supplementary-Fig-1.pdf)
Supplement: Supplementary file 1 [file kjim-2024-209-Supplementary-Fig-1.pdf]

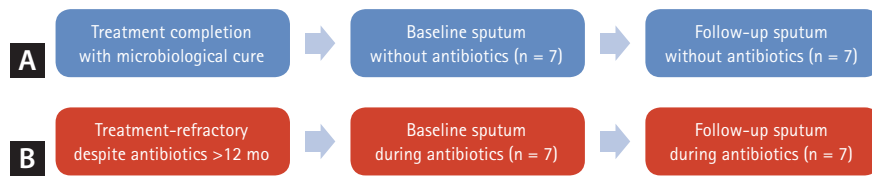

**Supplementary Figure 1.** Study samples. (A) Seven patients undergoing follow-up after achieving microbiological cure without antibiotics. (B) Seven patients in whom NTM persisted despite receiving antibiotic treatment for over 12 months. NTM, nontuberculous mycobacteria.
